# Supplementary material for: Strong and sustainable primary healthcare is associated with a lower risk of hospitalization in high risk patients
Source: PubMed Central journal article supplement (PMC7902818; doi:10.1038/s41598-021-83962-y), 2021-02-23
Supplement: 41598_2021_83962_MOESM1_ESM.pdf [file 41598_2021_83962_MOESM1_ESM.pdf]

# **Strong and sustainable primary healthcare is associated with a lower risk of hospitalization in high risk patients**

**Olga A. Sawicki<sup>1,\*</sup>, Angelina Mueller<sup>1</sup>, Renate Klaaßen-Mielke<sup>2</sup>, Anastasiya Glushan<sup>1</sup>, Ferdinand M. Gerlach<sup>1</sup>, Martin Beyer<sup>1</sup>, Michel Wensing<sup>3</sup>, and Kateryna Karimova<sup>1</sup>**

<sup>1</sup>Institute of General Practice, Goethe University, Frankfurt, 60590, Germany

<sup>2</sup>Institute of Medical Informatics, Biometry and Epidemiology, Ruhr University, Bochum, 44789, Germany

<sup>3</sup>Department of General Practice and Health Services Research and Implementation Science, 69129, Heidelberg, Germany

\*Corresponding author. Tel: + 49 69 6301 6476, Fax: + 49 69 6301 6428, E-mail address:

[sawicki@allgemeinmedizin.uni-frankfurt.de](mailto:sawicki@allgemeinmedizin.uni-frankfurt.de)

**Supplementary Table S1. Definition of covariates**

CHD, coronary heart disease; CHF, chronic heart failure; COPD, chronic obstructive pulmonary disease; CVD, cardiovascular disease; DMP, disease management program; DM, diabetes mellitus.

| <b>Covariate</b>           | <b>Operationalisation</b>                                                                                                                                      |
|----------------------------|----------------------------------------------------------------------------------------------------------------------------------------------------------------|
| Age                        | Age in decades in the year of observation                                                                                                                      |
| Sex                        | Male or female                                                                                                                                                 |
| Need for nursing           | Registered need for nursing care or no need of nursing care in the year of observation                                                                         |
| Rural practice             | Yes or no (according to zip code and area classification of the Federal Institute for Research on Building, Urban Affairs and Spatial Development)             |
| Group practice             | No or yes; Practising in a group practice with more than one doctor                                                                                            |
| DMP CHD                    | Yes or no; Participation in disease management program for CHD (used for the CHD and CHF cohort)                                                               |
| DMP DM                     | Yes or no; Participation in disease management program for diabetes mellitus typ 1 or 2 (used only for the diabetes, CHD and CHF cohort)                       |
| Hospital admission         | Yes or no. Hospital admission for any condition during the previous year                                                                                       |
| Charlson Comorbidity Index | 0-37; Calculated according to Sundararajan et al. <sup>25</sup>                                                                                                |
| Renal failure              | ICD-10: N18.2, N18.3, N18.4, N18.5, N18.8, N18.9 at least two outpatient diagnoses, or one inpatient diagnosis in the year under observation                   |
| COPD                       | ICD-10: J44 at least two outpatient diagnoses, or one inpatient diagnosis in the year under observation                                                        |
| Dementia                   | ICD-10: F00, F01, F02, F03, G30 at least two outpatient diagnoses, or one inpatient diagnosis in the year under observation (used only for the elderly cohort) |
| Depression                 | ICD-10: F32, F33 at least two outpatient diagnoses, or one inpatient diagnosis in the year under observation (used only for the elderly cohort)                |
| CHD                        | ICD-10: I25.0, I25.1, I25.2, I25.5, I25.6, I25.8, I25.9 at least two outpatient diagnoses, or one inpatient diagnosis during the previous year                 |
| CHF                        | ICD-10: I50 at least two outpatient diagnoses, or one inpatient diagnosis during the previous year                                                             |
| Myocardial infarction      | ICD-10: I21, I22, I25.2 as main inpatient diagnosis in the year under observation, or one inpatient diagnosis during the previous year                         |
| Hypertension               | ICD-10: I10-I15 at least two outpatient diagnoses, or one inpatient diagnosis in the year under observation                                                    |
| Atrial fibrillation        | ICD-10: I48.0, I48.1, I48.2, I48.3, I48.4, I48.9 at least two outpatient diagnoses, or one inpatient diagnosis during the previous year                        |

**Supplementary Table S2. Odds ratios for all-cause hospitalization in the elderly, based on generalized linear models of the longitudinal analysis from 2011-2018**

CHD, coronary heart disease; CHF, chronic heart failure; COPD, chronic obstructive pulmonary disease.

| <b>Variable</b>                                                    | <b>Interpretation</b>                              | <b>Odds Ratio</b> | <b>Lower<br/>95% CI</b> | <b>Upper<br/>95% CI</b> | <b>p-value</b> |
|--------------------------------------------------------------------|----------------------------------------------------|-------------------|-------------------------|-------------------------|----------------|
| Intervention effect at the start of the study                      | Primary care program versus control group          | 0.908             | 0.900                   | 0.916                   | <0.0001        |
| Time trend in the unexposed group                                  | Per year                                           | 0.973             | 0.971                   | 0.974                   | <0.0001        |
| Time trend modified by intervention                                | Primary care program versus control group per year | 0.981             | 0.979                   | 0.983                   | <0.0001        |
| Age                                                                | In decades                                         | 1.073             | 1.069                   | 1.078                   | <0.0001        |
| Sex                                                                | Male versus female                                 | 1.042             | 1.036                   | 1.048                   | <0.0001        |
| Group practice                                                     | Yes versus no                                      | 1.001             | 0.995                   | 1.006                   | 0.7427         |
| Rural practice                                                     | No versus yes                                      | 0.985             | 0.979                   | 0.990                   | <0.0001        |
| Charlson Comorbidity Index                                         | Per point                                          | 1.354             | 1.352                   | 1.356                   | <0.0001        |
| Need for nursing                                                   | Yes versus no                                      | 0.638             | 0.633                   | 0.643                   | <0.0001        |
| Renal failure                                                      | Yes versus no                                      | 1.467             | 1.455                   | 1.480                   | <0.0001        |
| CHF                                                                | Yes versus no                                      | 0.855             | 0.849                   | 0.862                   | <0.0001        |
| Hypertension                                                       | Yes versus no                                      | 1.486             | 1.477                   | 1.496                   | <0.0001        |
| COPD                                                               | Yes versus no                                      | 1.159             | 1.149                   | 1.169                   | <0.0001        |
| Atrial fibrillation                                                | Yes versus no                                      | 1.233             | 1.222                   | 1.243                   | <0.0001        |
| Myocardial infarction one inpatient diagnosis in the previous year | Yes versus no                                      | 1.137             | 1.110                   | 1.164                   | <0.0001        |
| Depression                                                         | Yes versus no                                      | 1.233             | 1.224                   | 1.241                   | <0.0001        |
| CHD                                                                | Yes versus no                                      | 0.962             | 0.956                   | 0.969                   | <0.0001        |
| Dementia                                                           | Yes versus no                                      | 1.311             | 1.298                   | 1.324                   | <0.0001        |
| Hospital admission                                                 | Yes versus no                                      | 0.911             | 0.905                   | 0.916                   | <0.0001        |

**Supplementary Table S3. Odds ratios for hospitalizations for ambulatory care-sensitive conditions in the elderly, based on generalized linear models of the longitudinal analysis from 2011-2018**

CHD, coronary heart disease; CHF, chronic heart failure; COPD, chronic obstructive pulmonary disease.

| Variable                                                           | Interpretation                                     | Odds Ratio | Lower 95% CI | Upper 95% CI | p-value |
|--------------------------------------------------------------------|----------------------------------------------------|------------|--------------|--------------|---------|
| Intervention effect at the start of the study                      | Primary care program versus control group          | 0.900      | 0.882        | 0.919        | <0.0001 |
| Time trend in the unexposed group                                  | Per year                                           | 0.978      | 0.974        | 0.981        | <0.0001 |
| Time trend modified by intervention                                | Primary care program versus control group per year | 0.986      | 0.981        | 0.990        | <0.0001 |
| Age                                                                | In decades                                         | 1.084      | 1.074        | 1.094        | <0.0001 |
| Sex                                                                | Male versus female                                 | 0.942      | 0.929        | 0.954        | <0.0001 |
| Group practice                                                     | Yes versus no                                      | 0.991      | 0.980        | 1.003        | 0.1580  |
| Rural practice                                                     | No versus yes                                      | 1.024      | 1.012        | 1.036        | 0.0001  |
| Charlson Comorbidity Index                                         | Per point                                          | 1.200      | 1.198        | 1.203        | <0.0001 |
| Need for nursing                                                   | Yes versus no                                      | 1.793      | 1.765        | 1.820        | <0.0001 |
| Renal failure                                                      | Yes versus no                                      | 1.580      | 1.557        | 1.603        | <0.0001 |
| CHF                                                                | Yes versus no                                      | 0.960      | 0.946        | 0.974        | <0.0001 |
| Hypertension                                                       | Yes versus no                                      | 1.628      | 1.603        | 1.655        | <0.0001 |
| COPD                                                               | Yes versus no                                      | 2.304      | 2.270        | 2.339        | <0.0001 |
| Atrial fibrillation                                                | Yes versus no                                      | 0.998      | 0.982        | 1.014        | 0.7949  |
| Myocardial infarction one inpatient diagnosis in the previous year | Yes versus no                                      | 1.094      | 1.050        | 1.140        | <0.0001 |
| Myocardial infarction as main inpatient diagnosis                  | Yes versus no                                      | 1.157      | 1.110        | 1.207        | <0.0001 |
| Depression                                                         | Yes versus no                                      | 1.236      | 1.218        | 1.253        | <0.0001 |
| CHD                                                                | Yes versus no                                      | 0.989      | 0.975        | 1.002        | 0.1070  |
| Dementia                                                           | Yes versus no                                      | 1.383      | 1.360        | 1.407        | <0.0001 |
| Hospital admission                                                 | Yes versus no                                      | 1.463      | 1.445        | 1.481        | <0.0001 |

**Supplementary Table S4. Odds ratios for hospitalization for hip fracture in the elderly, based on generalized linear models of the longitudinal analysis from 2011-2018**

CHD, coronary heart disease; CHF, chronic heart failure; COPD, chronic obstructive pulmonary disease.

| Variable                                                           | Interpretation                                     | Odds Ratio | Lower 95% CI | Upper 95% CI | p-value |
|--------------------------------------------------------------------|----------------------------------------------------|------------|--------------|--------------|---------|
| Intervention effect at the start of the study                      | Primary care program versus control group          | 0.943      | 0.905        | 0.983        | 0.0055  |
| Time trend in the unexposed group                                  | Per year                                           | 0.984      | 0.977        | 0.991        | <0.0001 |
| Time trend modified by intervention                                | Primary care program versus control group per year | 0.992      | 0.982        | 1.002        | 0.1046  |
| Age                                                                | In decades                                         | 2.093      | 2.057        | 2.130        | <0.0001 |
| Sex                                                                | Male versus female                                 | 0.646      | 0.629        | 0.664        | <0.0001 |
| Group practice                                                     | Yes versus no                                      | 0.978      | 0.956        | 1.001        | 0.0578  |
| Rural practice                                                     | No versus yes                                      | 1.009      | 0.987        | 1.032        | 0.4268  |
| Charlson Comorbidity Index                                         | Per point                                          | 1.092      | 1.086        | 1.097        | <0.0001 |
| Need for nursing                                                   | Yes versus no                                      | 2.043      | 1.980        | 2.109        | <0.0001 |
| Renal failure                                                      | Yes versus no                                      | 1.659      | 1.610        | 1.709        | <0.0001 |
| CHF                                                                | Yes versus no                                      | 0.845      | 0.822        | 0.870        | <0.0001 |
| Hypertension                                                       | Yes versus no                                      | 1.203      | 1.169        | 1.238        | <0.0001 |
| COPD                                                               | Yes versus no                                      | 1.073      | 1.038        | 1.111        | <0.0001 |
| Atrial fibrillation                                                | Yes versus no                                      | 1.027      | 0.996        | 1.059        | 0.0843  |
| Myocardial infarction one inpatient diagnosis in the previous year | Yes versus no                                      | 0.865      | 0.772        | 0.968        | 0.0116  |
| Myocardial infarction as main inpatient diagnosis                  | Yes versus no                                      | 0.882      | 0.792        | 0.982        | 0.0217  |
| Depression                                                         | Yes versus no                                      | 1.130      | 1.100        | 1.161        | <0.0001 |
| CHD                                                                | Yes versus no                                      | 0.851      | 0.828        | 0.875        | <0.0001 |
| Dementia                                                           | Yes versus no                                      | 2.079      | 2.021        | 2.139        | <0.0001 |
| Hospital admission                                                 | Yes versus no                                      | 1.113      | 1.086        | 1.141        | <0.0001 |

**Supplementary Table S5. Odds ratios for all-cause hospitalization in diabetics, based on generalized linear models of the longitudinal analysis from 2011-2018**

CHD, coronary heart disease; CHF, chronic heart failure; COPD, chronic obstructive pulmonary disease; DMP, disease management program; DM, diabetes mellitus.

| Variable                                                                | Interpretation                                     | Odds Ratio | Lower<br>95% CI | Upper<br>95% CI | p-value |
|-------------------------------------------------------------------------|----------------------------------------------------|------------|-----------------|-----------------|---------|
| Intervention effect at the start of the study                           | Primary care program versus control group          | 0.949      | 0.935           | 0.964           | <0.0001 |
| Time trend in the unexposed group                                       | Per year                                           | 0.969      | 0.966           | 0.971           | <0.0001 |
| Time trend modified by intervention                                     | Primary care program versus control group per year | 0.983      | 0.980           | 0.987           | <0.0001 |
| Age                                                                     | In decades                                         | 0.962      | 0.958           | 0.967           | <0.0001 |
| Sex                                                                     | Male versus female                                 | 0.993      | 0.984           | 1.002           | 0.1203  |
| Group practice                                                          | Yes versus no                                      | 1.010      | 1.002           | 1.019           | 0.0196  |
| DMP DM                                                                  | Yes versus no                                      | 0.732      | 0.726           | 0.739           | <0.0001 |
| Rural practice                                                          | No versus yes                                      | 0.996      | 0.988           | 1.005           | 0.4065  |
| Charlson Comorbidity Index                                              | Per point                                          | 1.380      | 1.377           | 1.384           | <0.0001 |
| Need for nursing                                                        | Yes versus no                                      | 1.654      | 1.635           | 1.674           | <0.0001 |
| Renal failure                                                           | Yes versus no                                      | 1.356      | 1.340           | 1.372           | <0.0001 |
| CHF                                                                     | Yes versus no                                      | 0.903      | 0.893           | 0.913           | <0.0001 |
| Hypertension                                                            | Yes versus no                                      | 1.470      | 1.454           | 1.487           | <0.0001 |
| COPD                                                                    | Yes versus no                                      | 1.118      | 1.103           | 1.132           | <0.0001 |
| Atrial fibrillation                                                     | Yes versus no                                      | 1.234      | 1.219           | 1.250           | <0.0001 |
| Myocardial infarction, one inpatient diagnosis during the previous year | Yes versus no                                      | 1.085      | 1.052           | 1.120           | <0.0001 |
| CHD                                                                     | Yes versus no                                      | 1.046      | 1.035           | 1.056           | <0.0001 |
| Hospital admission                                                      | Yes versus no                                      | 1.305      | 1.294           | 1.317           | <0.0001 |

**Supplementary Table S6. Odds ratios for hospitalizations for ambulatory care-sensitive conditions in diabetics, based on generalized linear models of the longitudinal analysis from 2011-2018**

CHD, coronary heart disease; CHF, chronic heart failure; COPD, chronic obstructive pulmonary disease; DMP, disease management program; DM, diabetes mellitus.

| Variable                                                                | Interpretation                                     | Odds Ratio | Lower 95% CI | Upper 95% CI | p-value |
|-------------------------------------------------------------------------|----------------------------------------------------|------------|--------------|--------------|---------|
| Intervention effect at the start of the study                           | Primary care program versus control group          | 0.943      | 0.914        | 0.974        | 0.0004  |
| Time trend in the unexposed group                                       | Per year                                           | 0.971      | 0.966        | 0.976        | <0.0001 |
| Time trend modified by intervention                                     | Primary care program versus control group per year | 0.984      | 0.977        | 0.991        | <0.0001 |
| Age                                                                     | In decades                                         | 0.980      | 0.971        | 0.989        | <0.0001 |
| Sex                                                                     | Male versus female                                 | 0.964      | 0.946        | 0.982        | <0.0001 |
| Group practice                                                          | Yes versus no                                      | 1.009      | 0.991        | 1.026        | 0.3225  |
| DMP DM                                                                  | Yes versus no                                      | 0.828      | 0.812        | 0.844        | <0.0001 |
| Rural practice                                                          | No versus yes                                      | 1.017      | 1.000        | 1.035        | 0.0530  |
| Charlson Comorbidity Index                                              | Per point                                          | 1.205      | 1.201        | 1.209        | <0.0001 |
| Need for nursing                                                        | Yes versus no                                      | 1.851      | 1.813        | 1.890        | <0.0001 |
| Renal failure                                                           | Yes versus no                                      | 1.699      | 1.665        | 1.734        | <0.0001 |
| CHF                                                                     | Yes versus no                                      | 1.011      | 0.991        | 1.032        | 0.2806  |
| Hypertension                                                            | Yes versus no                                      | 1.537      | 1.498        | 1.576        | <0.0001 |
| COPD                                                                    | Yes versus no                                      | 1.914      | 1.873        | 1.955        | <0.0001 |
| Atrial fibrillation                                                     | Yes versus no                                      | 1.004      | 0.982        | 1.027        | 0.7330  |
| Myocardial infarction, one inpatient diagnosis during the previous year | Yes versus no                                      | 1.041      | 0.990        | 1.095        | 0.1146  |
| Myocardial infarction as main inpatient diagnosis                       | Yes versus no                                      | 1.138      | 1.076        | 1.203        | <0.0001 |
| CHD                                                                     | Yes versus no                                      | 1.010      | 0.990        | 1.029        | 0.3404  |
| Hospital admission                                                      | Yes versus no                                      | 1.593      | 1.566        | 1.621        | <0.0001 |

**Supplementary Table S7. Odds ratios for diabetic-related hospital admissions in diabetics, based on generalized linear models of the longitudinal analysis from 2011-2018**

CHD, coronary heart disease; CHF, chronic heart failure; COPD, chronic obstructive pulmonary disease; DMP, disease management program; DM, diabetes mellitus.

| Variable                                                                | Interpretation                                     | Odds Ratio | Lower 95% CI | Upper 95% CI | p-value |
|-------------------------------------------------------------------------|----------------------------------------------------|------------|--------------|--------------|---------|
| Intervention effect at the start of the study                           | Primary care program versus control group          | 0.833      | 0.794        | 0.874        | <0.0001 |
| Time trend in the unexposed group                                       | Per year                                           | 0.934      | 0.926        | 0.942        | <0.0001 |
| Time trend modified by intervention                                     | Primary care program versus control group per year | 0.996      | 0.985        | 1.007        | 0.4610  |
| Age                                                                     | In decades                                         | 0.747      | 0.737        | 0.758        | <0.0001 |
| Sex                                                                     | Male versus female                                 | 1.183      | 1.151        | 1.217        | <0.0001 |
| Group practice                                                          | Yes versus no                                      | 1.004      | 0.978        | 1.032        | 0.7444  |
| DMP DM                                                                  | Yes versus no                                      | 1.128      | 1.095        | 1.163        | <0.0001 |
| Rural practice                                                          | No versus yes                                      | 0.959      | 0.933        | 0.985        | 0.0025  |
| Charlson Comorbidity Index                                              | Per point                                          | 1.223      | 1.217        | 1.229        | <0.0001 |
| Need for nursing                                                        | Yes versus no                                      | 1.871      | 1.812        | 1.933        | <0.0001 |
| Renal failure                                                           | Yes versus no                                      | 2.117      | 2.050        | 2.185        | <0.0001 |
| CHF                                                                     | Yes versus no                                      | 0.987      | 0.956        | 1.019        | 0.4224  |
| Hypertension                                                            | Yes versus no                                      | 1.613      | 1.550        | 1.679        | <0.0001 |
| COPD                                                                    | Yes versus no                                      | 0.807      | 0.778        | 0.838        | <0.0001 |
| Atrial fibrillation                                                     | Yes versus no                                      | 0.962      | 0.928        | 0.998        | 0.0372  |
| Myocardial infarction, one inpatient diagnosis during the previous year | Yes versus no                                      | 0.992      | 0.920        | 1.070        | 0.8403  |
| Myocardial infarction as main inpatient diagnosis                       | Yes versus no                                      | 1.041      | 0.959        | 1.131        | 0.3366  |
| CHD                                                                     | Yes versus no                                      | 1.004      | 0.974        | 1.035        | 0.8107  |
| Hospital admission                                                      | Yes versus no                                      | 1.557      | 1.515        | 1.599        | <0.0001 |



**Supplementary Table S8. Odds ratios for all-cause hospitalization in CHF patients, based on generalized linear models of the longitudinal analysis from 2011-2018**

CHD, coronary heart disease; CHF, chronic heart failure; COPD, chronic obstructive pulmonary disease; DMP, disease management program; DM, diabetes mellitus.

| <b>Variable</b>                                                         | <b>Interpretation</b>                              | <b>Odds Ratio</b> | <b>Lower<br/>95% CI</b> | <b>Upper<br/>95% CI</b> | <b>p-value</b> |
|-------------------------------------------------------------------------|----------------------------------------------------|-------------------|-------------------------|-------------------------|----------------|
| Intervention effect at the start of the study                           | Primary care program versus control group          | 0.980             | 0.960                   | 0.999                   | 0.0409         |
| Time trend in the unexposed group                                       | Per year                                           | 0.970             | 0.966                   | 0.973                   | <0.0001        |
| Time trend modified by intervention                                     | Primary care program versus control group per year | 0.975             | 0.971                   | 0.979                   | <0.0001        |
| Age                                                                     | In decades                                         | 0.954             | 0.949                   | 0.959                   | <0.0001        |
| Sex                                                                     | Male versus female                                 | 1.028             | 1.016                   | 1.040                   | <0.0001        |
| Group practice                                                          | Yes versus no                                      | 1.012             | 1.001                   | 1.022                   | 0.0341         |
| DMP DM                                                                  | Yes versus no                                      | 0.572             | 0.564                   | 0.579                   | <0.0001        |
| DMP CHD                                                                 | Yes versus no                                      | 0.996             | 0.980                   | 1.011                   | 0.5854         |
| Rural practice                                                          | No versus yes                                      | 1.007             | 0.996                   | 1.018                   | 0.1861         |
| Charlson Comorbidity Index                                              | Per point                                          | 1.331             | 1.327                   | 1.334                   | <0.0001        |
| Need for nursing                                                        | Yes versus no                                      | 1.567             | 1.547                   | 1.587                   | <0.0001        |
| Renal failure                                                           | Yes versus no                                      | 1.651             | 1.628                   | 1.673                   | <0.0001        |
| Hypertension                                                            | Yes versus no                                      | 1.550             | 1.529                   | 1.571                   | <0.0001        |
| COPD                                                                    | Yes versus no                                      | 1.114             | 1.099                   | 1.130                   | <0.0001        |
| Atrial fibrillation                                                     | Yes versus no                                      | 1.265             | 1.250                   | 1.280                   | <0.0001        |
| Myocardial infarction, one inpatient diagnosis during the previous year | Yes versus no                                      | 1.185             | 1.152                   | 1.219                   | <0.0001        |
| CHD                                                                     | Yes versus no                                      | 1.001             | 0.988                   | 1.014                   | 0.8920         |
| Hospital admission                                                      | Yes versus no                                      | 1.480             | 1.464                   | 1.496                   | <0.0001        |

**Supplementary Table S9. Odds ratios for hospitalizations for ambulatory care-sensitive conditions in CHF patients, based on generalized linear models of the longitudinal analysis from 2011-2018**

CHD, coronary heart disease; CHF, chronic heart failure; COPD, chronic obstructive pulmonary disease; DMP, disease management program; DM, diabetes mellitus.

| Variable                                                                | Interpretation                                     | Odds Ratio | Lower<br>95% CI | Upper<br>95% CI | p-value |
|-------------------------------------------------------------------------|----------------------------------------------------|------------|-----------------|-----------------|---------|
| Intervention effect at the start of the study                           | Primary care program versus control group          | 0.978      | 0.941           | 1.017           | 0.2638  |
| Time trend in the unexposed group                                       | Per year                                           | 0.987      | 0.980           | 0.994           | 0.0001  |
| Time trend modified by intervention                                     | Primary care program versus control group per year | 0.970      | 0.961           | 0.978           | <0.0001 |
| Age                                                                     | In decades                                         | 0.970      | 0.959           | 0.981           | <0.0001 |
| Sex                                                                     | Male versus female                                 | 0.984      | 0.962           | 1.006           | 0.1508  |
| Group practice                                                          | Yes versus no                                      | 0.995      | 0.975           | 1.016           | 0.6334  |
| DMP DM                                                                  | Yes versus no                                      | 0.929      | 0.908           | 0.951           | <0.0001 |
| DMP CHD                                                                 | Yes versus no                                      | 0.849      | 0.824           | 0.873           | <0.0001 |
| Rural practice                                                          | No versus yes                                      | 1.017      | 0.996           | 1.038           | 0.1076  |
| Charlson Comorbidity Index                                              | Per point                                          | 1.170      | 1.165           | 1.175           | <0.0001 |
| Need for nursing                                                        | Yes versus no                                      | 1.841      | 1.800           | 1.884           | <0.0001 |
| Renal failure                                                           | Yes versus no                                      | 1.654      | 1.617           | 1.692           | <0.0001 |
| Hypertension                                                            | Yes versus no                                      | 1.402      | 1.363           | 1.442           | <0.0001 |
| COPD                                                                    | Yes versus no                                      | 2.184      | 2.135           | 2.234           | <0.0001 |
| Atrial fibrillation                                                     | Yes versus no                                      | 0.963      | 0.942           | 0.984           | 0.0006  |
| Myocardial infarction, one inpatient diagnosis during the previous year | Yes versus no                                      | 1.047      | 0.998           | 1.097           | 0.0590  |
| Myocardial infarction as main inpatient diagnosis                       | Yes versus no                                      | 1.161      | 1.088           | 1.239           | <0.0001 |
| CHD                                                                     | Yes versus no                                      | 1.007      | 0.983           | 1.032           | 0.5600  |
| Hospital admission                                                      | Yes versus no                                      | 1.596      | 1.564           | 1.629           | <0.0001 |

**Supplementary Table S10. Odds ratios for cardiovascular-related hospital admissions in CHF patients, based on generalized linear models of the longitudinal analysis from 2011-2018**

CHD, coronary heart disease; CHF, chronic heart failure; COPD, chronic obstructive pulmonary disease; DMP, disease management program; DM, diabetes mellitus.

| Variable                                                                | Interpretation                                     | Odds Ratio | Lower 95% CI | Upper 95% CI | p-value |
|-------------------------------------------------------------------------|----------------------------------------------------|------------|--------------|--------------|---------|
| Intervention effect at the start of the study                           | Primary care program versus control group          | 0.925      | 0.901        | 0.949        | <0.0001 |
| Time trend in the unexposed group                                       | Per year                                           | 0.962      | 0.957        | 0.966        | <0.0001 |
| Time trend modified by intervention                                     | Primary care program versus control group per year | 0.975      | 0.969        | 0.981        | <0.0001 |
| Age                                                                     | In decades                                         | 0.991      | 0.983        | 0.999        | 0.0276  |
| Sex                                                                     | Male versus female                                 | 1.024      | 1.009        | 1.040        | 0.0018  |
| Group practice                                                          | Yes versus no                                      | 1.011      | 0.997        | 1.025        | 0.1411  |
| DMP DM                                                                  | Yes versus no                                      | 0.678      | 0.667        | 0.690        | <0.0001 |
| DMP CHD                                                                 | Yes versus no                                      | 1.212      | 1.189        | 1.236        | <0.0001 |
| Rural practice                                                          | No versus yes                                      | 1.008      | 0.994        | 1.022        | 0.2820  |
| Charlson Comorbidity Index                                              | Per point                                          | 1.222      | 1.218        | 1.226        | <0.0001 |
| Need for nursing                                                        | Yes versus no                                      | 1.059      | 1.042        | 1.077        | <0.0001 |
| Renal failure                                                           | Yes versus no                                      | 1.899      | 1.870        | 1.929        | <0.0001 |
| Hypertension                                                            | Yes versus no                                      | 1.456      | 1.429        | 1.483        | <0.0001 |
| COPD                                                                    | Yes versus no                                      | 1.020      | 1.003        | 1.038        | 0.0224  |
| Atrial fibrillation                                                     | Yes versus no                                      | 1.533      | 1.511        | 1.556        | <0.0001 |
| Myocardial infarction, one inpatient diagnosis during the previous year | Yes versus no                                      | 1.520      | 1.472        | 1.569        | <0.0001 |
| CHD                                                                     | Yes versus no                                      | 1.234      | 1.213        | 1.255        | <0.0001 |
| Hospital admission                                                      | Yes versus no                                      | 1.340      | 1.322        | 1.359        | <0.0001 |

**Supplementary Table S11. Odds ratios for all-cause hospitalization in CHD patients, based on generalized linear models of the longitudinal analysis from 2011-2018**

CHD, coronary heart disease; CHF, chronic heart failure; COPD, chronic obstructive pulmonary disease; DMP, disease management program; DM, diabetes mellitus.

| <b>Variable</b>                                                         | <b>Interpretation</b>                              | <b>Odds Ratio</b> | <b>Lower<br/>95% CI</b> | <b>Upper<br/>95% CI</b> | <b>p-value</b> |
|-------------------------------------------------------------------------|----------------------------------------------------|-------------------|-------------------------|-------------------------|----------------|
| Intervention effect at the start of the study                           | Primary care program versus control group          | 0.962             | 0.946                   | 0.979                   | <0.0001        |
| Time trend in the unexposed group                                       | Per year                                           | 0.969             | 0.966                   | 0.972                   | <0.0001        |
| Time trend modified by intervention                                     | Primary care program versus control group per year | 0.983             | 0.979                   | 0.986                   | <0.0001        |
| Age                                                                     | In decades                                         | 0.966             | 0.960                   | 0.971                   | <0.0001        |
| Sex                                                                     | Male versus female                                 | 0.971             | 0.961                   | 0.981                   | <0.0001        |
| Group practice                                                          | Yes versus no                                      | 1.017             | 1.007                   | 1.027                   | 0.0009         |
| DMP DM                                                                  | Yes versus no                                      | 0.565             | 0.558                   | 0.572                   | <0.0001        |
| DMP CHD                                                                 | Yes versus no                                      | 0.947             | 0.937                   | 0.957                   | <0.0001        |
| Rural practice                                                          | No versus yes                                      | 0.997             | 0.987                   | 1.007                   | 0.5774         |
| Charlson Comorbidity Index                                              | Per point                                          | 1.368             | 1.365                   | 1.372                   | <0.0001        |
| Need for nursing                                                        | Yes versus no                                      | 1.555             | 1.535                   | 1.577                   | <0.0001        |
| Renal failure                                                           | Yes versus no                                      | 1.474             | 1.455                   | 1.494                   | <0.0001        |
| CHF                                                                     | Yes versus no                                      | 0.895             | 0.886                   | 0.904                   | <0.0001        |
| Hypertension                                                            | Yes versus no                                      | 1.766             | 1.743                   | 1.789                   | <0.0001        |
| COPD                                                                    | Yes versus no                                      | 1.078             | 1.064                   | 1.093                   | <0.0001        |
| Atrial fibrillation                                                     | Yes versus no                                      | 1.250             | 1.235                   | 1.266                   | <0.0001        |
| Myocardial infarction, one inpatient diagnosis during the previous year | Yes versus no                                      | 1.224             | 1.197                   | 1.251                   | <0.0001        |
| Hospital admission                                                      | Yes versus no                                      | 1.137             | 1.126                   | 1.148                   | <0.0001        |

**Supplementary Table S12. Odds ratios for hospitalizations for ambulatory care-sensitive conditions in CHD patients, based on generalized linear models of the longitudinal analysis from 2011-2018**

CHD, coronary heart disease; CHF, chronic heart failure; COPD, chronic obstructive pulmonary disease; DMP, disease management program; DM, diabetes mellitus.

| Variable                                                                | Interpretation                                     | Odds Ratio | Lower<br>95% CI | Upper<br>95% CI | p-value |
|-------------------------------------------------------------------------|----------------------------------------------------|------------|-----------------|-----------------|---------|
| Intervention effect at the start of the study                           | Primary care program versus control group          | 0.970      | 0.936           | 1.005           | 0.0969  |
| Time trend in the unexposed group                                       | Per year                                           | 0.983      | 0.977           | 0.989           | <0.0001 |
| Time trend modified by intervention                                     | Primary care program versus control group per year | 0.984      | 0.976           | 0.992           | <0.0001 |
| Age                                                                     | In decades                                         | 1.010      | 0.998           | 1.021           | 0.0951  |
| Sex                                                                     | Male versus female                                 | 0.849      | 0.831           | 0.867           | <0.0001 |
| Group practice                                                          | Yes versus no                                      | 1.005      | 0.985           | 1.025           | 0.6222  |
| DMP DM                                                                  | Yes versus no                                      | 0.965      | 0.944           | 0.986           | 0.0015  |
| DMP CHD                                                                 | Yes versus no                                      | 0.807      | 0.790           | 0.824           | <0.0001 |
| Rural practice                                                          | No versus yes                                      | 1.016      | 0.996           | 1.036           | 0.1141  |
| Charlson Comorbidity Index                                              | Per point                                          | 1.192      | 1.188           | 1.197           | <0.0001 |
| Need for nursing                                                        | Yes versus no                                      | 1.793      | 1.752           | 1.835           | <0.0001 |
| Renal failure                                                           | Yes versus no                                      | 1.594      | 1.559           | 1.630           | <0.0001 |
| CHF                                                                     | Yes versus no                                      | 0.969      | 0.950           | 0.989           | 0.0027  |
| Hypertension                                                            | Yes versus no                                      | 1.600      | 1.554           | 1.648           | <0.0001 |
| COPD                                                                    | Yes versus no                                      | 2.037      | 1.992           | 2.084           | <0.0001 |
| Atrial fibrillation                                                     | Yes versus no                                      | 0.995      | 0.972           | 1.018           | 0.6446  |
| Myocardial infarction, one inpatient diagnosis during the previous year | Yes versus no                                      | 1.075      | 1.034           | 1.118           | 0.0003  |
| Myocardial infarction as main inpatient diagnosis                       | Yes versus no                                      | 1.150      | 1.089           | 1.215           | <0.0001 |
| Hospital admission                                                      | Yes versus no                                      | 1.514      | 1.485           | 1.543           | <0.0001 |

**Supplementary Table S13. Odds ratios for cardiovascular-related hospital admissions in CHD patients, based on generalized linear models of the longitudinal analysis from 2011-2018**

CHD, coronary heart disease; CHF, chronic heart failure; COPD, chronic obstructive pulmonary disease; DMP, disease management program; DM, diabetes mellitus.

| Variable                                                                | Interpretation                                     | Odds Ratio | Lower 95% CI | Upper 95% CI | p-value |
|-------------------------------------------------------------------------|----------------------------------------------------|------------|--------------|--------------|---------|
| Intervention effect at the start of the study                           | Primary care program versus control group          | 0.921      | 0.901        | 0.942        | <0.0001 |
| Time trend in the unexposed group                                       | Per year                                           | 0.965      | 0.961        | 0.969        | <0.0001 |
| Time trend modified by intervention                                     | Primary care program versus control group per year | 0.978      | 0.973        | 0.983        | <0.0001 |
| Age                                                                     | In decades                                         | 0.963      | 0.956        | 0.969        | <0.0001 |
| Sex                                                                     | Male versus female                                 | 1.010      | 0.997        | 1.024        | 0.1330  |
| Group practice                                                          | Yes versus no                                      | 1.005      | 0.993        | 1.018        | 0.3972  |
| DMP DM                                                                  | Yes versus no                                      | 0.655      | 0.646        | 0.665        | <0.0001 |
| DMP CHD                                                                 | Yes versus no                                      | 1.109      | 1.095        | 1.124        | <0.0001 |
| Rural practice                                                          | No versus yes                                      | 1.009      | 0.997        | 1.022        | 0.1476  |
| Charlson Comorbidity Index                                              | Per point                                          | 1.260      | 1.257        | 1.263        | <0.0001 |
| Need for nursing                                                        | Yes versus no                                      | 0.996      | 0.980        | 1.012        | 0.5957  |
| Renal failure                                                           | Yes versus no                                      | 1.645      | 1.621        | 1.670        | <0.0001 |
| CHF                                                                     | Yes versus no                                      | 1.046      | 1.033        | 1.060        | <0.0001 |
| Hypertension                                                            | Yes versus no                                      | 1.780      | 1.749        | 1.813        | <0.0001 |
| COPD                                                                    | Yes versus no                                      | 0.969      | 0.954        | 0.984        | 0.0001  |
| Atrial fibrillation                                                     | Yes versus no                                      | 1.399      | 1.378        | 1.420        | <0.0001 |
| Myocardial infarction, one inpatient diagnosis during the previous year | Yes versus no                                      | 1.458      | 1.421        | 1.495        | <0.0001 |
| Hospital admission                                                      | Yes versus no                                      | 1.199      | 1.185        | 1.214        | <0.0001 |

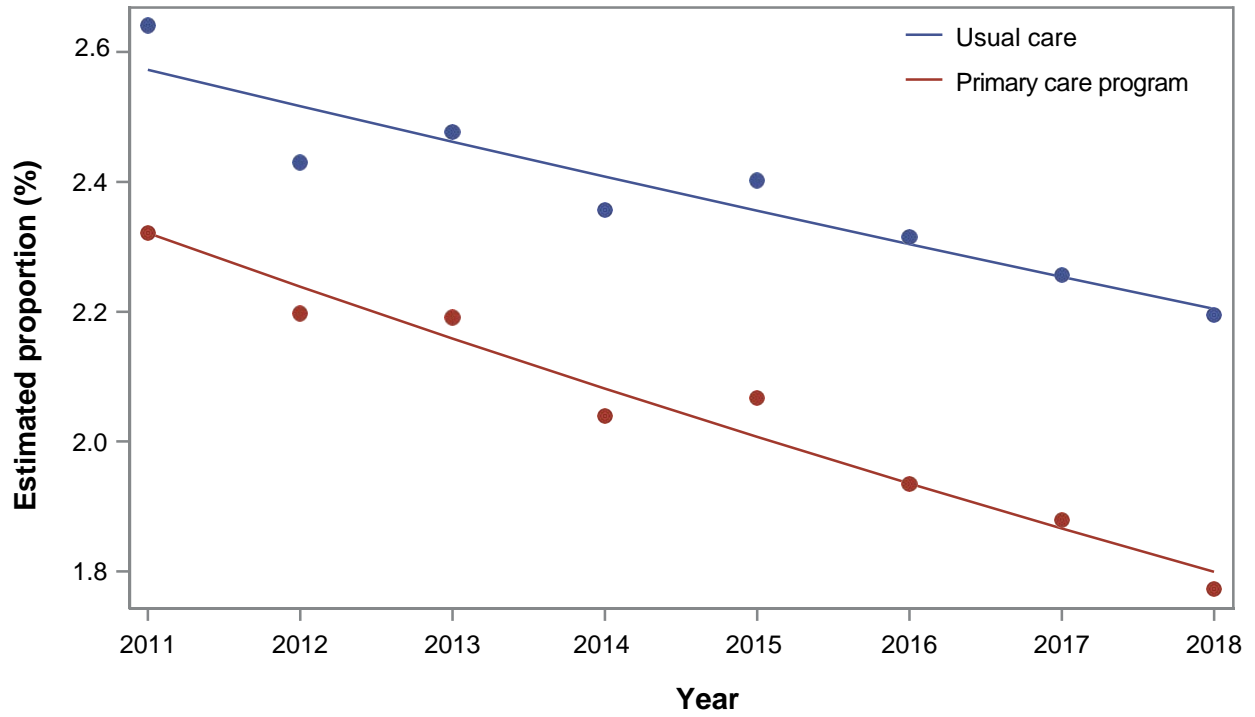

**Supplementary Figure S1. Estimated proportions of hospitalizations for ambulatory care-sensitive conditions in the elderly, based on generalized linear models of the longitudinal analysis from 2011-2018**

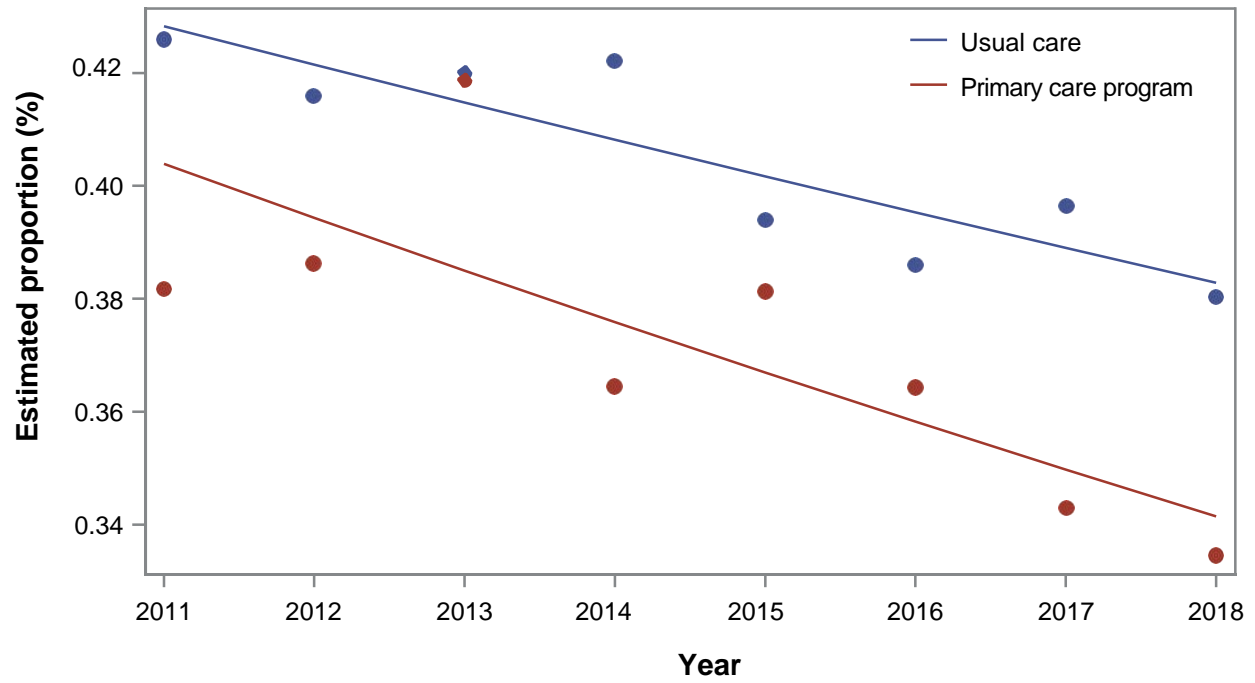

**Supplementary Figure S2. Estimated proportions of hospitalization for hip fracture in the elderly, based on generalized linear models of the longitudinal analysis from 2011-2018**



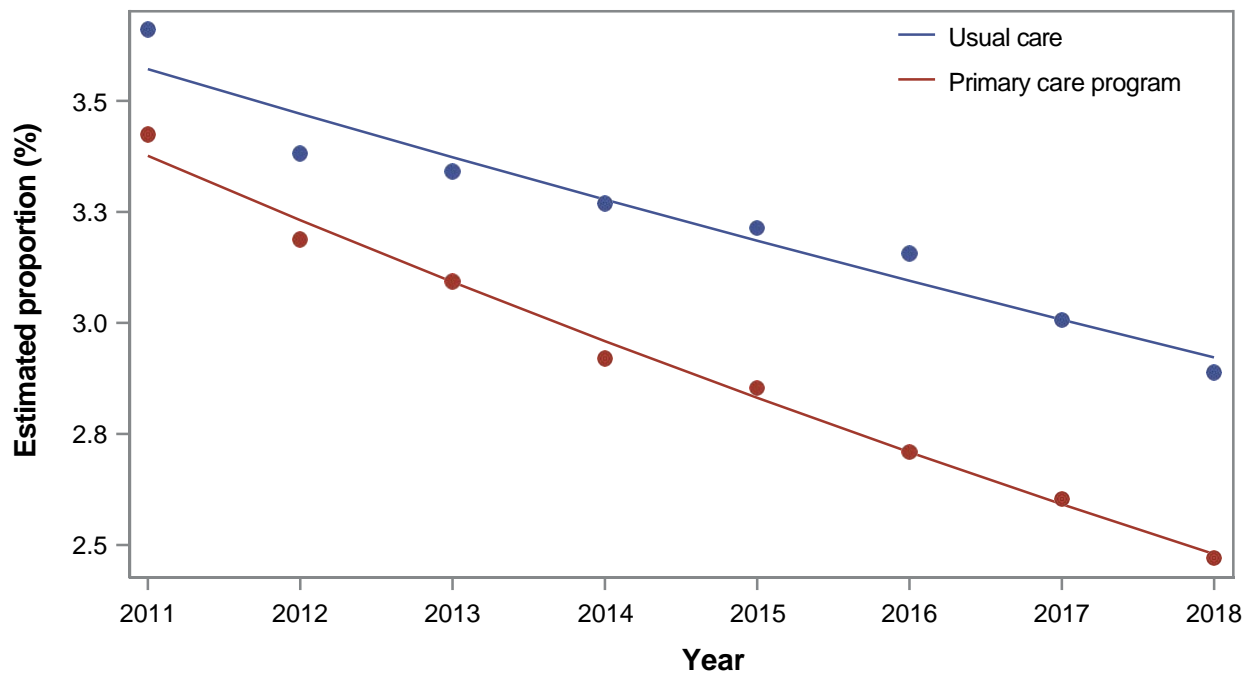

**Supplementary Figure S3. Estimated proportions of ambulatory care-sensitive conditions in diabetics, based on generalized linear models of the longitudinal analysis from 2011-2018**

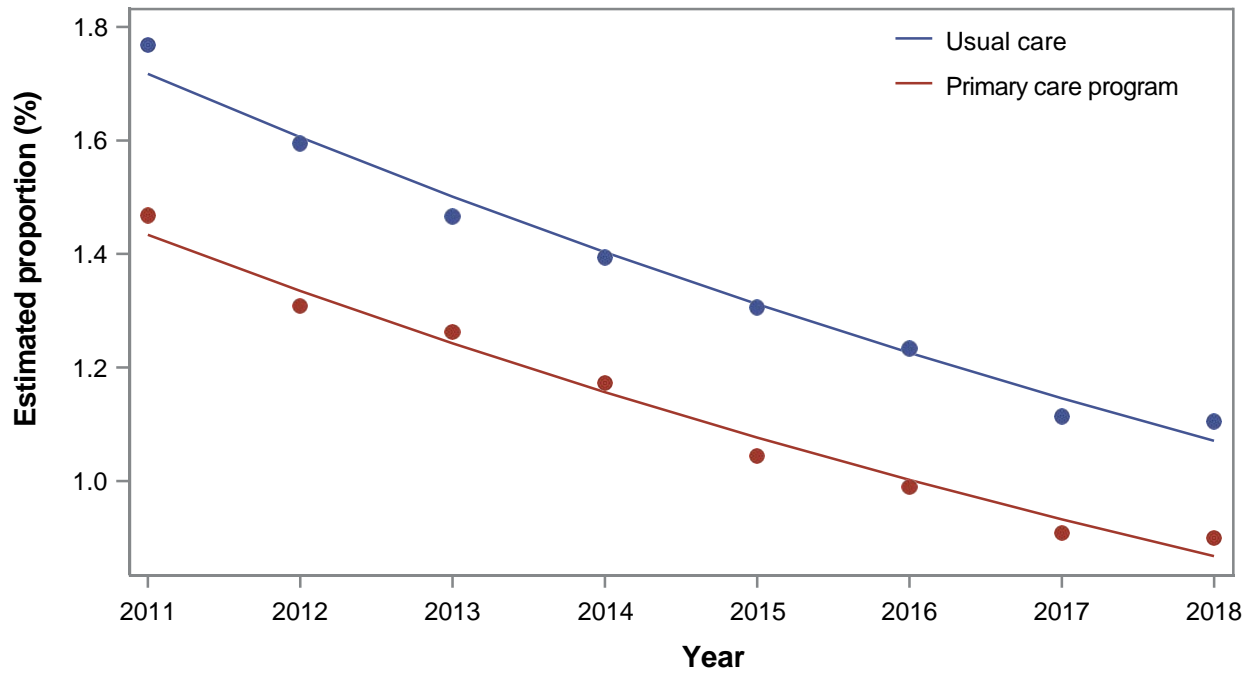

**Supplementary Figure S4. Estimated proportions of diabetic-related hospital admissions in diabetics, based on generalized linear models of the longitudinal analysis from 2011-2018**

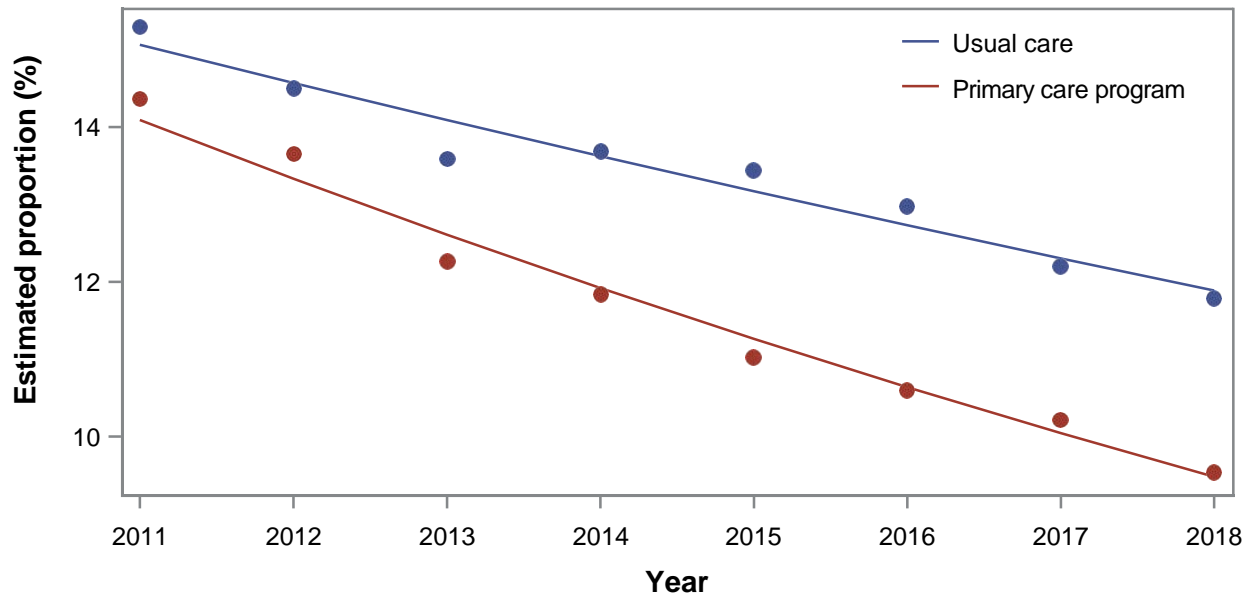

**Supplementary Figure S5. Estimated proportions of cardiovascular-related hospital admissions in CHF patients, based on generalized linear models of the longitudinal analysis from 2011-2018**

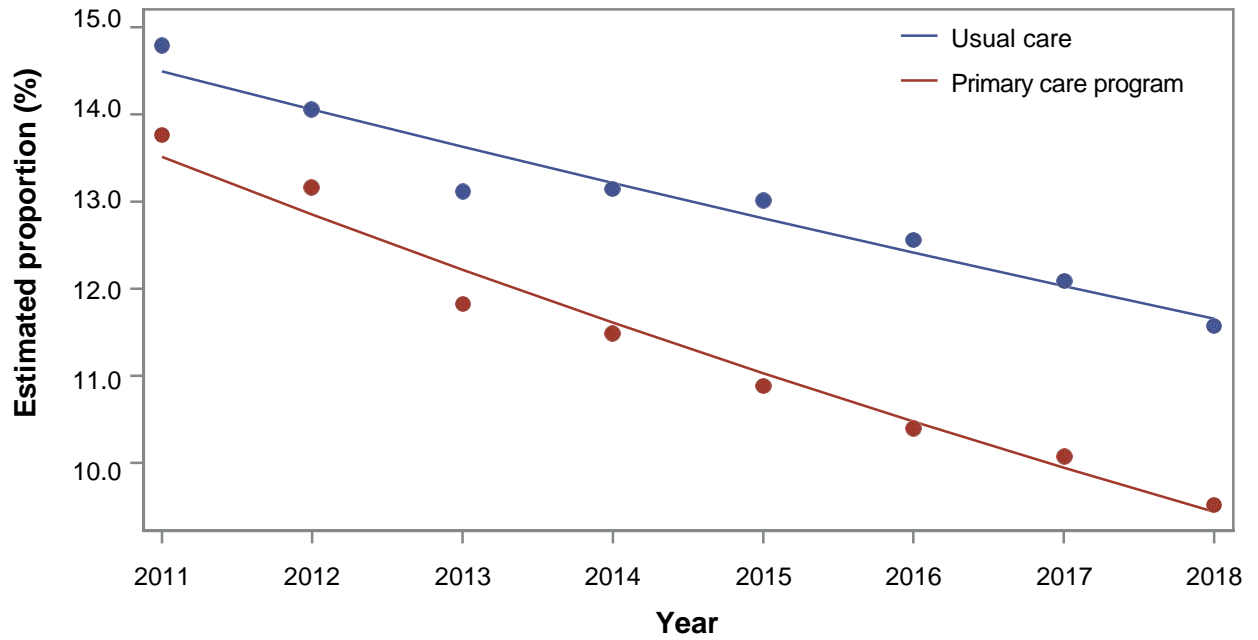

**Supplementary Figure S6. Estimated proportions of cardiovascular-related hospital admissions in CHD patients, based on generalized linear models of the longitudinal analysis from 2011-2018**

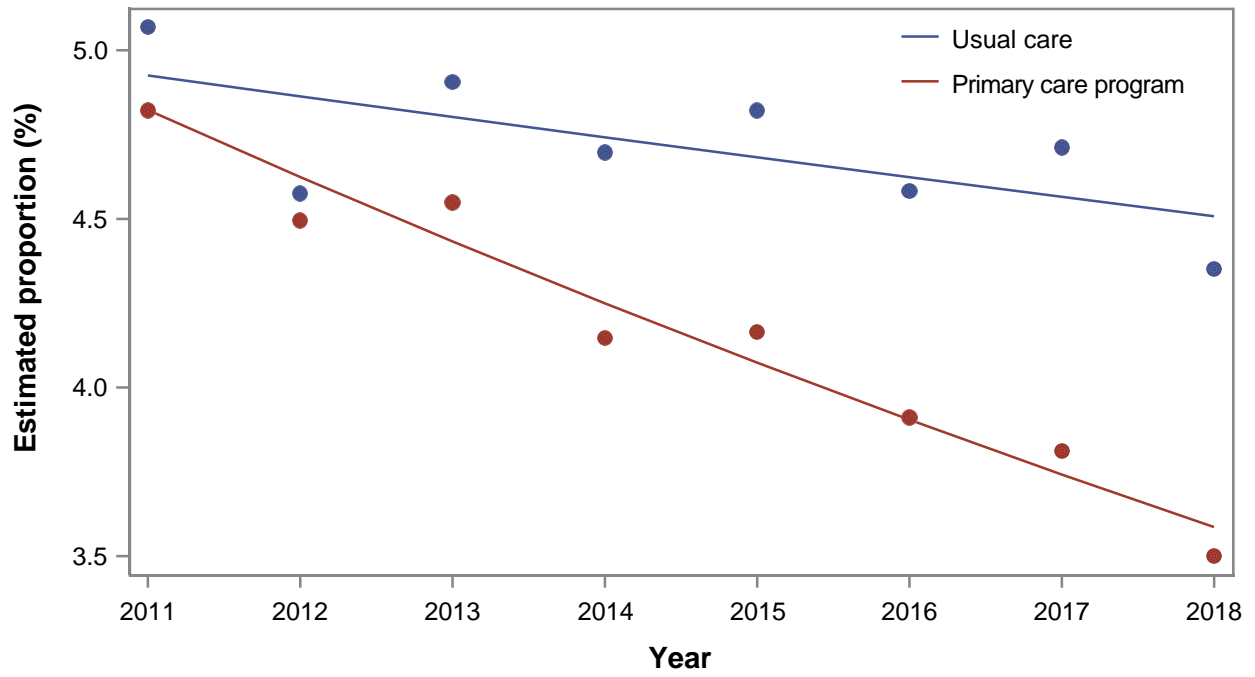

**Supplementary Figure S7. Estimated proportions of hospitalizations for ambulatory care-sensitive conditions in CHF patients, based on generalized linear models of the longitudinal analysis from 2011-2018**

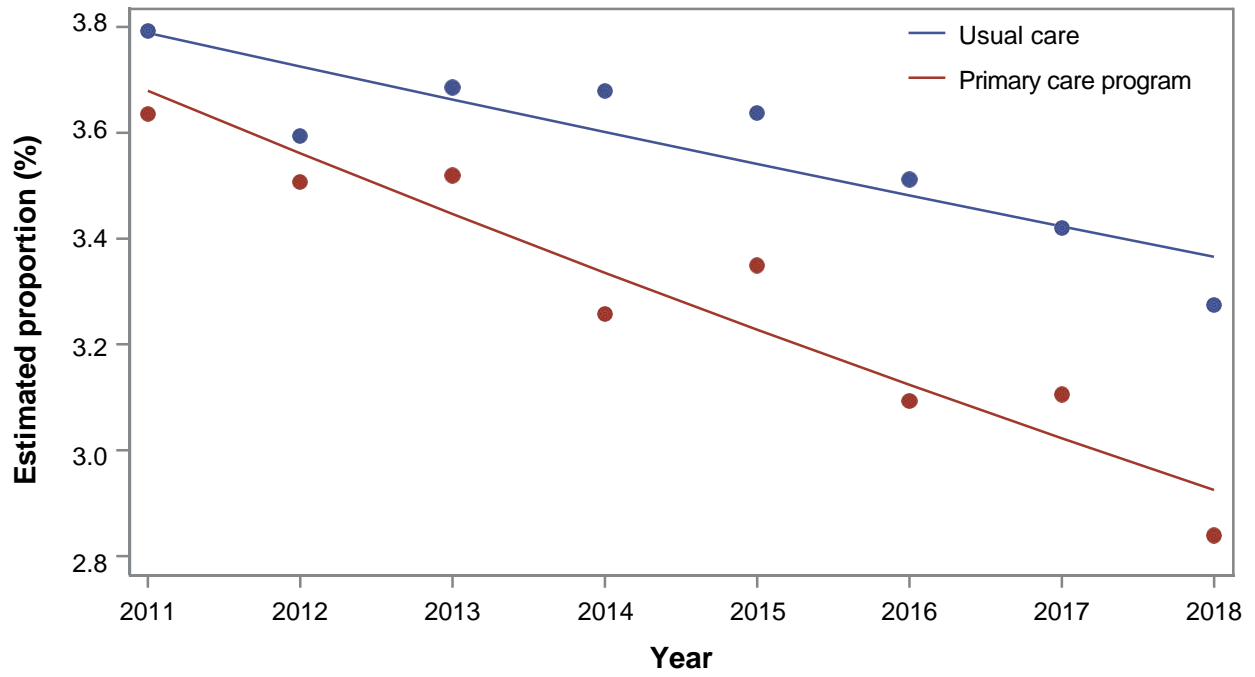

**Supplementary Figure S8. Estimated proportions of hospitalizations for ambulatory care-sensitive conditions in CHD patients, based on generalized linear models of the longitudinal analysis from 2011-2018**

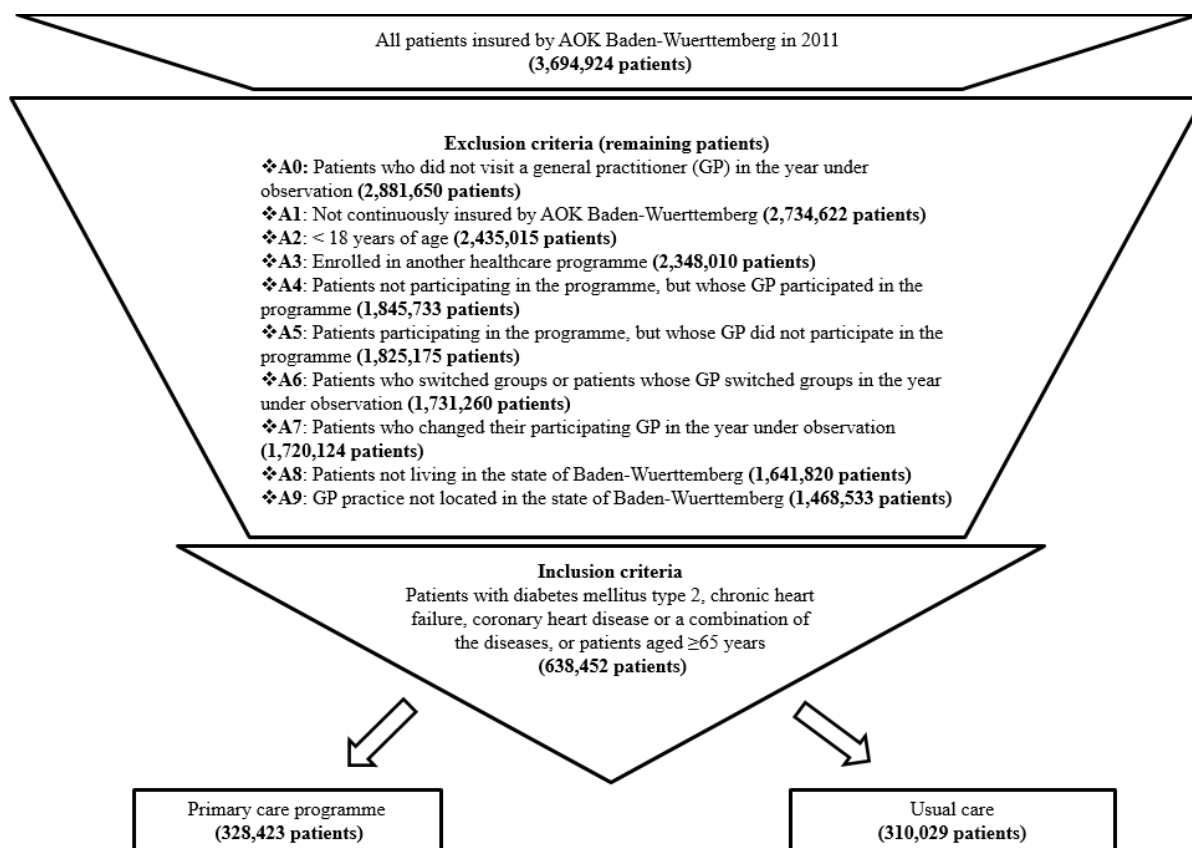

**Supplementary Figure S9. Exemplary flow chart for 2011 showing general inclusion and exclusion criteria**  
All inclusion and exclusion criteria were applied annually.
